# Supplementary material for: Airborne bacterial emission fluxes from manure‐fertilized agricultural soil
Source: PubMed Central journal article supplement — Microb Biotechnol. 2020 Jul 22;13(5):1631–47. doi: 10.1111/1751-7915.13632 (PMC7415373; doi:10.1111/1751-7915.13632), 2020-07-22
Supplement: MBT2-13-1631-s004.pdf [file MBT2-13-1631-s004.pdf]

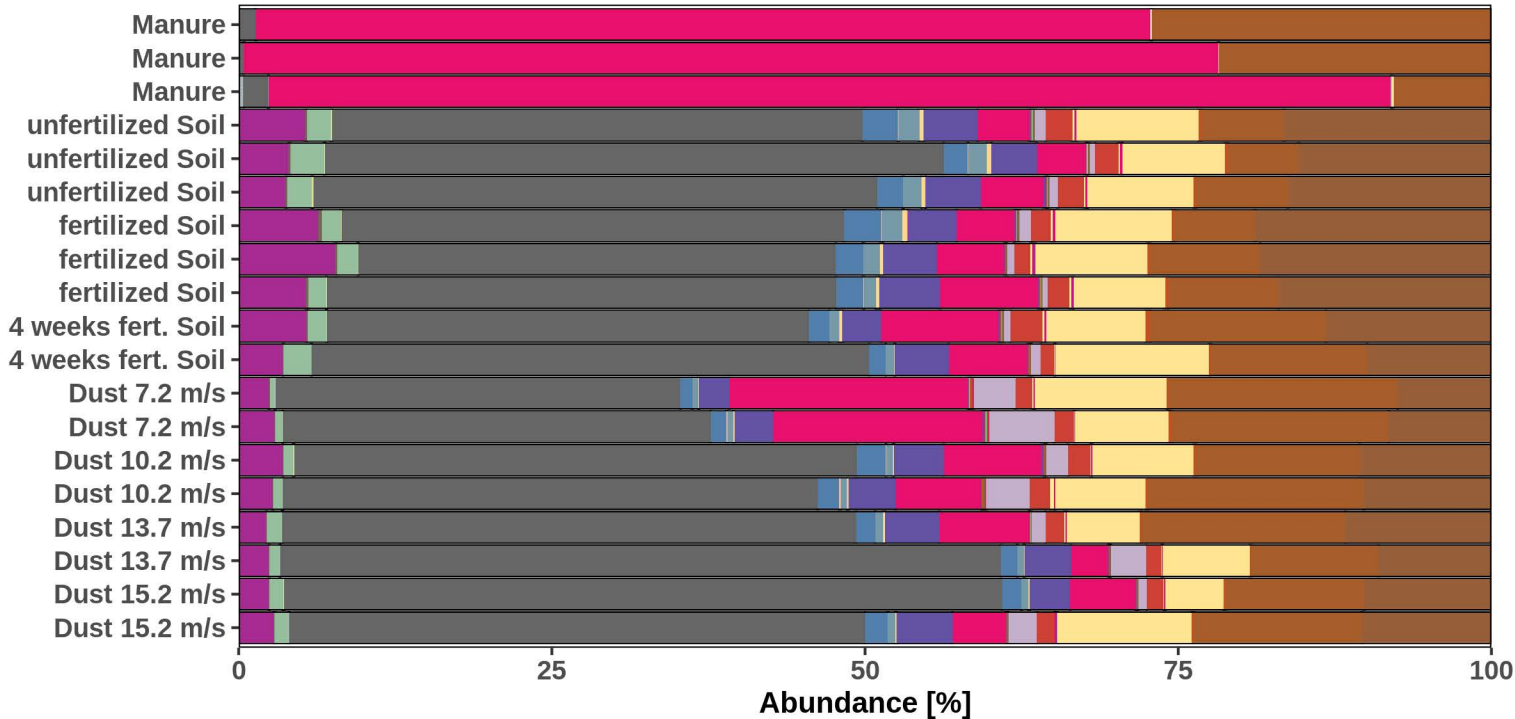

**Rank2**

|                                                                                       |                         |                                                                                       |                               |
|---------------------------------------------------------------------------------------|-------------------------|---------------------------------------------------------------------------------------|-------------------------------|
|    | D_1_Acidobacteria       |    | D_1_Latescibacteria           |
|    | D_1_Actinobacteria      |    | D_1_Microgenomates            |
|    | D_1_Armatimonadetes     |    | D_1_Nitrospinae               |
|    | D_1_Bacteroidetes       |    | D_1_Nitrospirae               |
|    | D_1_Bathyarchaeota      |    | D_1_Omnitrophica              |
|    | D_1_BRC1                |    | D_1_Parcubacteria             |
|    | D_1_Chlamydiae          |    | D_1_Peregrinibacteria         |
|    | D_1_Chlorobi            |    | D_1_Planctomycetes            |
|    | D_1_Chloroflexi         |    | D_1_Proteobacteria            |
|    | D_1_Cyanobacteria       |    | D_1_RBG-1 (Zixibacteria)      |
|    | D_1_Deinococcus-Thermus |    | D_1_Saccharibacteria          |
|    | D_1_Elusimicrobia       |    | D_1_Spirochaetae              |
|    | D_1_Euryarchaeota       |    | D_1_Tectomicrobia             |
|    | D_1_FBP                 |    | D_1_Tenericutes               |
|   | D_1_FCPU426             |   | D_1_Thaumarchaeota            |
|  | D_1_Fibrobacteres       |  | D_1_TM6 (Dependentiae)        |
|  | D_1_Firmicutes          |  | D_1_Verrucomicrobia           |
|  | D_1_Gemmatimonadetes    |  | D_1_Woeseearchaeota (DHVEG-6) |
|  | D_1_Hydrogenedentes     |  | D_1_WS2                       |
|  | D_1_Ignavibacteriae     |                                                                                       |                               |
