# Supplementary figures and images for: Airborne bacterial emission fluxes from manure‐fertilized agricultural soil
Source: PubMed Central journal article supplement — Microb Biotechnol. 2020 Jul 22;13(5):1631–47. doi: 10.1111/1751-7915.13632 (PMC7415373; doi:10.1111/1751-7915.13632), 2020-07-22

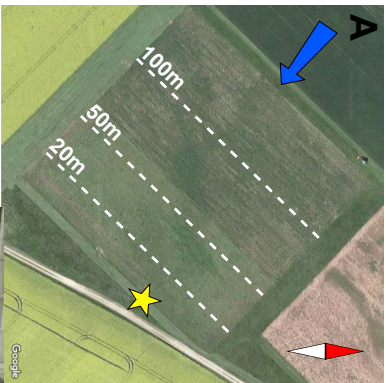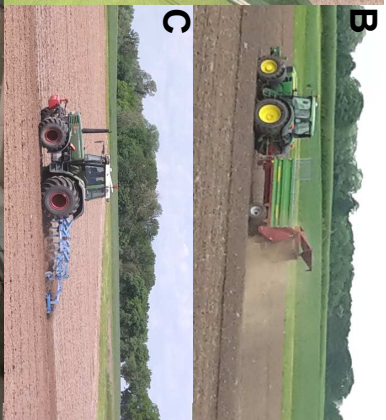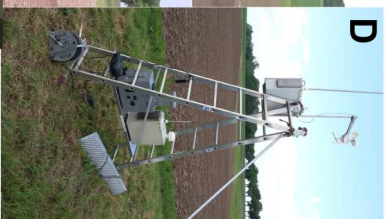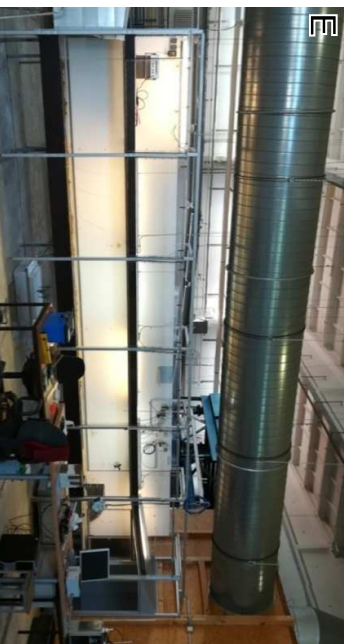

Supplement: MBT2-13-1631-s001.pdf [file MBT2-13-1631-s001.pdf]

## Manure application

3.80 m

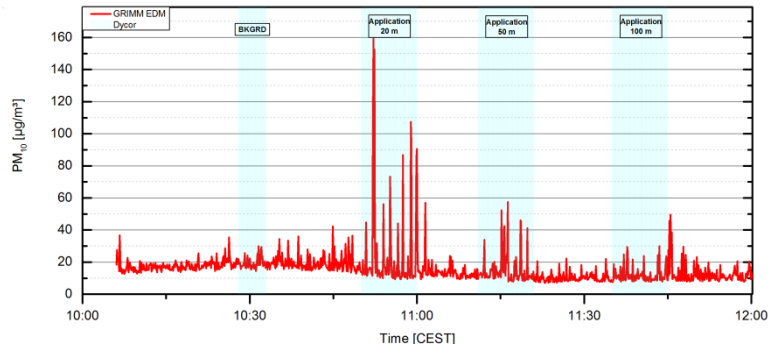

1.50 m

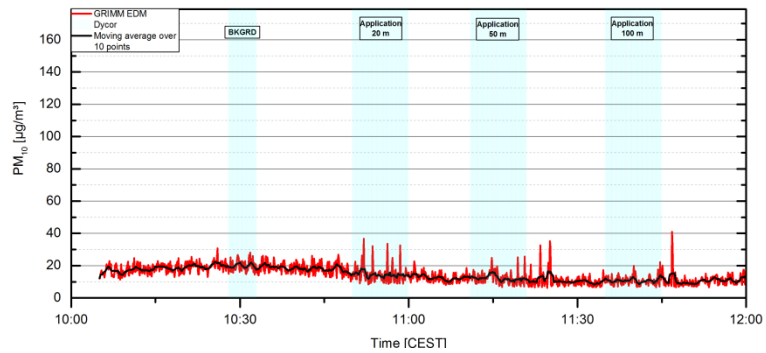

## Manure incorporation

3.80 m

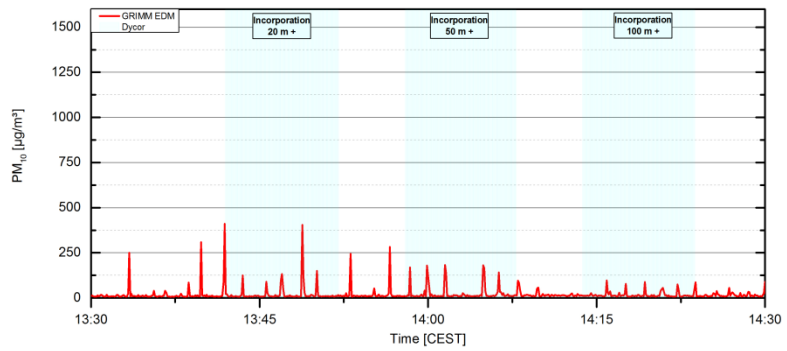

1.50 m

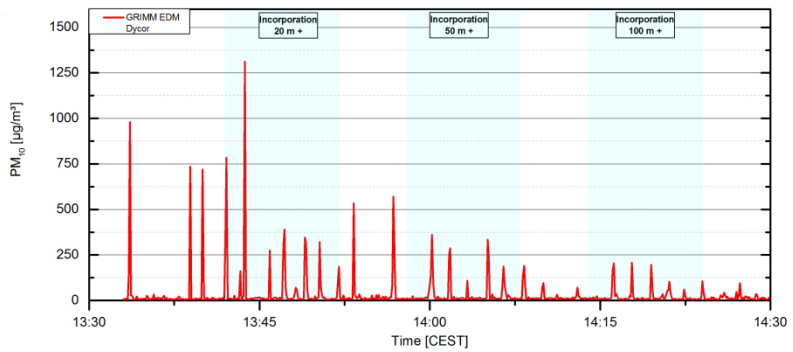

Supplement: MBT2-13-1631-s002.pdf [file MBT2-13-1631-s002.pdf]

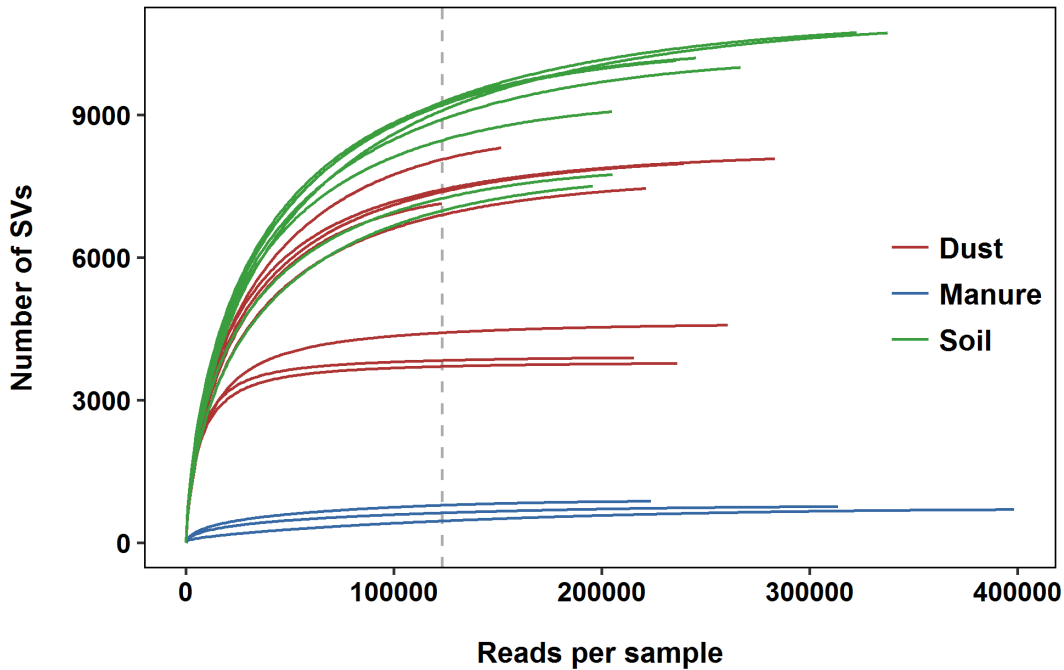

Supplement: MBT2-13-1631-s003.pdf [file MBT2-13-1631-s003.pdf]

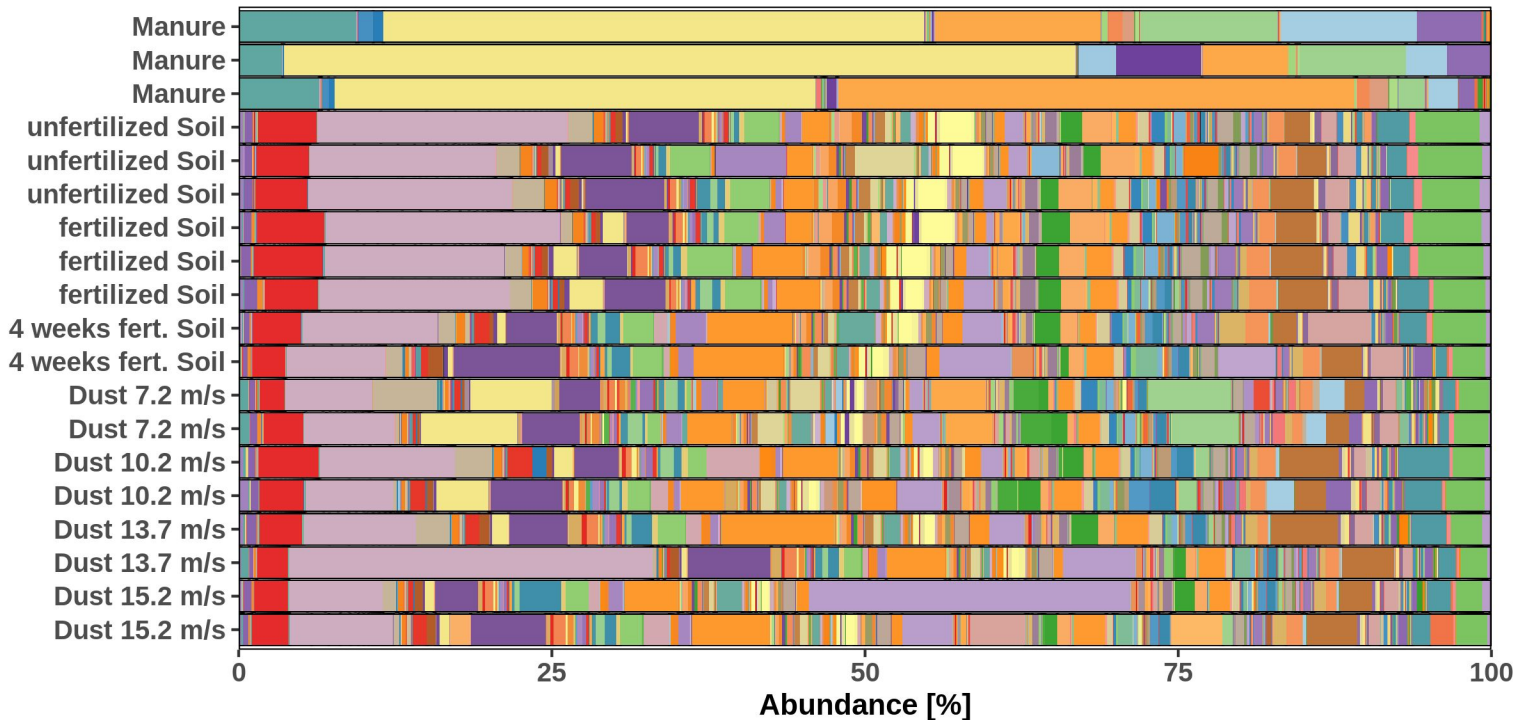

Supplement: MBT2-13-1631-s005.pdf [file MBT2-13-1631-s005.pdf]
